# Supplementary material for: Effects of climate change in European croplands and grasslands: productivity, greenhouse gas balance and soil carbon storage
Source: Copernicus journal article supplement (doi:10.5194/bg-19-3021-2022), 2022-06-22
Supplement: Supplementary file 1 [file bg-19-3021-2022-supplement.pdf]

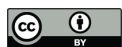

*Supplement of*

**Effects of climate change in European croplands and grasslands:  
productivity, greenhouse gas balance and soil carbon storage**

**Marco Carozzi et al.**

*Correspondence to:* Marco Carozzi ([marco.carozzi@inrae.fr](mailto:marco.carozzi@inrae.fr))

The copyright of individual parts of the supplement might differ from the article licence.

## S.1 Soil parameter calculation

The elementary data for each simulation unit obtained from the European Soil Database (ESDB; Hiederer, 2013), were used to calculate the specific input parameters for CERES-EGC and PaSim models. Both models require the saturated hydraulic conductivity ( $\text{cm day}^{-1}$ ) and the hydraulic parameters ( $\text{m}^3 \text{ m}^{-3}$ ; calculated following Wösten et al., 1999), as well as the  
5 initialisation of carbon and nitrogen pools. More specifically CERES-EGC requires soil albedo (-; Jones and Kiniry, 1986), topsoil evaporation parameters ( $\text{mm}$ ; Ritchie, 1972), soil thermal conductivity ( $\text{J cm}^{-1} \text{ K}^{-1} \text{ day}^{-1}$ ; Hoffmann et al., 1993), the parameters of the water retention curve (Driessen, 1986; Wösten et al., 1999), the root resistance parameter (-; Jones and Kiniry, 1986) and the soil calcium carbonate (function pH values of topsoil). PaSim requires the slope of the soil moisture, the air entry potential (Campbell, 1974), and the relative root dry matter in different soil layers (function of layer depth).

## 10 S.2 Fractioning of nitrogen fertiliser application

Nitrogen amount per each crop and year ( $\text{kg N ha}^{-1} \text{ y}^{-1}$ ) was defined as the average amounts designed for that crop in the most frequent succession in the simulation unit. Fertiliser time distribution and fractionation were established based on crop type and the sowing date, total nitrogen amount and mineral to organic repartition. For all the crops organic N amount was supplied  
5 days before the sowing date to a soil depth of 10 cm, whereas mineral N fertiliser was applied at 2 cm depth as a function of  
15 the total nitrogen amount. If the organic N amount was greater than a fixed threshold of  $50 \text{ kg N ha}^{-1}$ , mineral N was applied respectively 75 or 120 days after the sowing as a function of the crop seeding period (spring or winter crops). On the other hand, if the organic N amount was lower than  $50 \text{ kg ha}^{-1}$  and the mineral N greater than  $50 \text{ kg N ha}^{-1}$ , a third of the amount was applied at the sowing date and two third respectively 75 or 120 days after sowing, as a function of the crop sowing period. Finally, if both mineral and organic fertiliser amounts were lower than the fixed N threshold, all mineral N fraction was applied  
20 at the sowing date.

## S.3 Grassland productions in EU

Low production for grasslands were observed for the Alpine area, with an average of  $3.16 \text{ t DM ha}^{-1} \text{ y}^{-1}$  (max  $6.67 \text{ t DM ha}^{-1} \text{ y}^{-1}$ ) and for the Mediterranean regions (Greece, the southern regions of France, Italy, Portugal and Spain, including central regions of Italy and Spain) with an average of  $4.34 \text{ t DM ha}^{-1} \text{ y}^{-1}$  (max  $9.24 \text{ t DM ha}^{-1} \text{ y}^{-1}$ ). Higher values of  $7.5 \text{ t DM ha}^{-1} \text{ y}^{-1}$   
25 (max  $15 \text{ t DM ha}^{-1} \text{ y}^{-1}$ ) were observed for the Atlantic area (Denmark, Netherland, Belgium, Luxembourg, northern Germany, Ireland, UK, France, Spain and northern Portugal), while the Boreal and Nemoral areas (Sweden and Finland, Lithuania, Latvia and Estonia) have an average of  $6.12 \text{ t DM ha}^{-1} \text{ y}^{-1}$  (max  $8.67 \text{ t DM ha}^{-1} \text{ y}^{-1}$ ). The continental region (central-southern and eastern Germany, Czech Republic, Slovakia, northern Austria, Poland, Romania, Bulgaria and part of central-eastern France) scored an average production of  $4.92 \text{ t DM ha}^{-1} \text{ y}^{-1}$  (max  $11 \text{ t DM ha}^{-1} \text{ y}^{-1}$ ); Fig. S1.  
30 Compared to Smit et al. (2008), a slight underestimation of the productions (-15 %; 8 % of the surface) is reported for the Atlantic North zone (10 % of the surface). Chang et al. (2015a) reported the same divergences for this area in the simulation

of the grassland productivity over Europe. Other Authors reported an overestimation of the Mediterranean area (e.g. van Oijen et al., 2014, Chang et al., 2015a; Chang et al., 2015b, Chang et al., 2017; Blanke et al., 2018). As reported by these Authors, divergences are explicable by the fact that ecosystem models calculate potential (maximum) productions, whereas statistics productivities are based on real harvest data. Furthermore, local low productions can be related to the lack of irrigation which is widespread e.g. in the Atlantic North region (Wriedt et al., 2009).

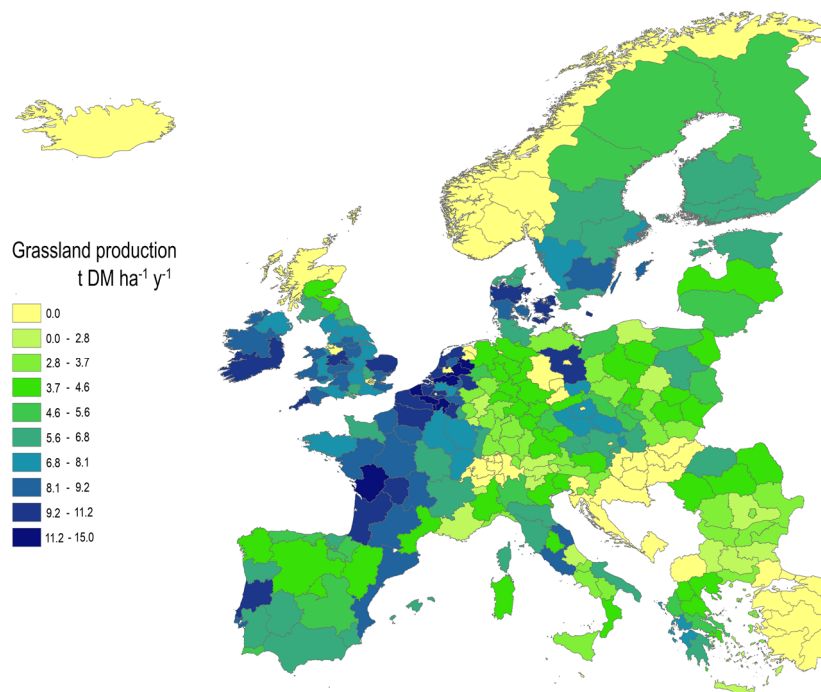

Fig. S1. Simulated grassland productions over Europe with PaSim model in the period 1978-2004, reported at NUTS2 level. Production ( $\text{t DM ha}^{-1} \text{ y}^{-1}$ ) are the sum of livestock intake and mowing.

#### 40 S.4 CO<sub>2</sub> fertilisation

The effect of the increases in atmospheric CO<sub>2</sub> was not implemented in CERES-EGC model, whereas is considered in the PaSim model. Kimball (2016) reported a potential increase of crop yields for C3 species to +19 % at 550 ppm, a concentration close to the maximum reached in RCP4.5 scenario (538.35 ppm). Similarly, for CO<sub>2</sub> concentrations close to the maximum reached in RCP8.5 (935 ppm) a further increase of production is forecasted by Tubiello et al. (2007). However, no effects are expected for C4 plants, as maize (Allen et al., 1990). In reality, crop yield increases can be offset by a downregulation of photosynthetic capacity (Long et al., 2004). Similarly, grasslands dominated by C3 species benefit from the rise in CO<sub>2</sub> concentration, whereas C4 species can be favoured only by the rise of air temperatures (Morgan et al., 2011). Thus, PaSim model is able to counterbalance the production decreases due to adverse climatic conditions with the positive effect of rising CO<sub>2</sub> expected during the climatic projections. This can explain the low correlation with production and air temperatures.

50 Additionally, growing CO<sub>2</sub> concentrations reduces plant evapotranspiration and contributing to increase productions in water-

limited environments (Kimball, 2016). Crop models used for impact assessment have different formalism to simulate CO<sub>2</sub> effects, from a simple correction of final biomass produced to more complex methods (Tubiello and Ewert, 2002). Besides, all these models still needing a strength comparison with reliable experiment with elevated CO<sub>2</sub> and temperatures (Ainsworth et al., 2008).

55

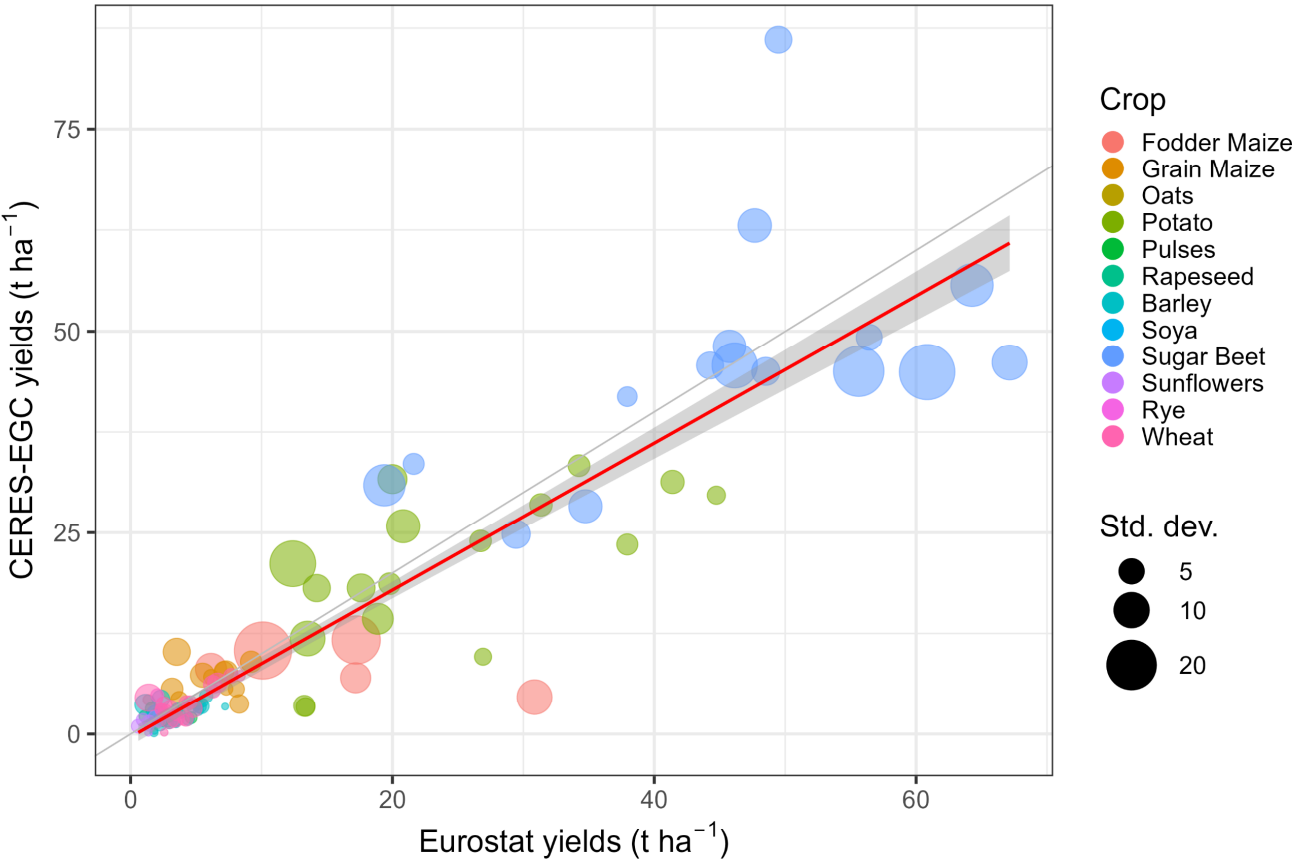

Fig S2. Comparison between simulated (CERES-EGC) and statistics (Eurostat) yields for the simulated crops in the 1978-2004 period. Each point represents the average 1978-2004 aggregated by country (NUTS0 level) and by crop type. Red line is the regression over the plotted points.  $R^2 = 0.92$ ;  $p < 0.01$ .

60



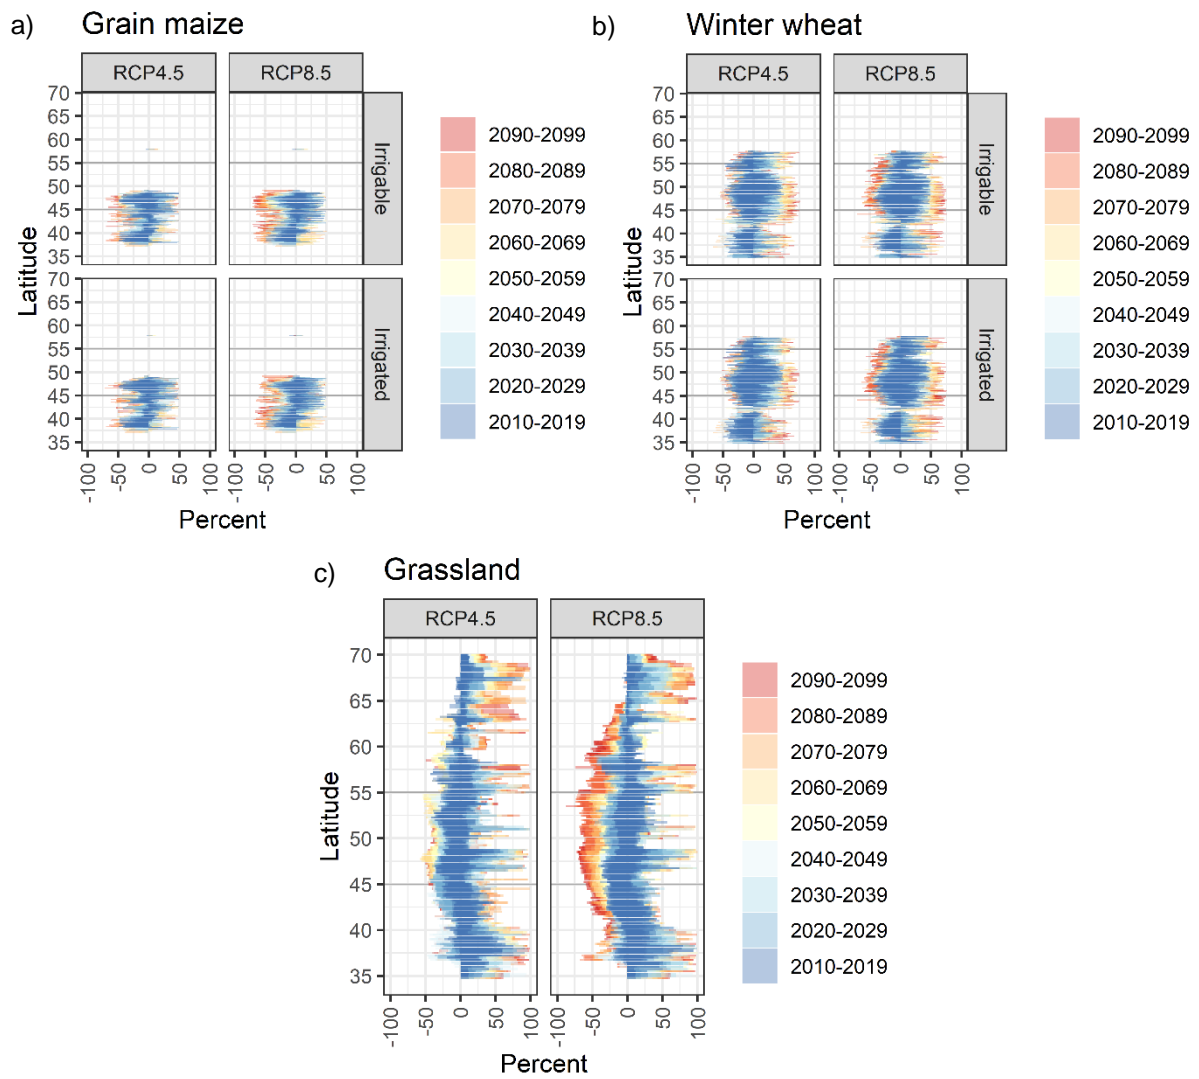

Fig S3. Relative productions compared to the historical period (1978-2004). a) Grain maize; b) Winter soft wheat; c) Grasslands. Grassland productivity is the sum of animal intake and mowing.

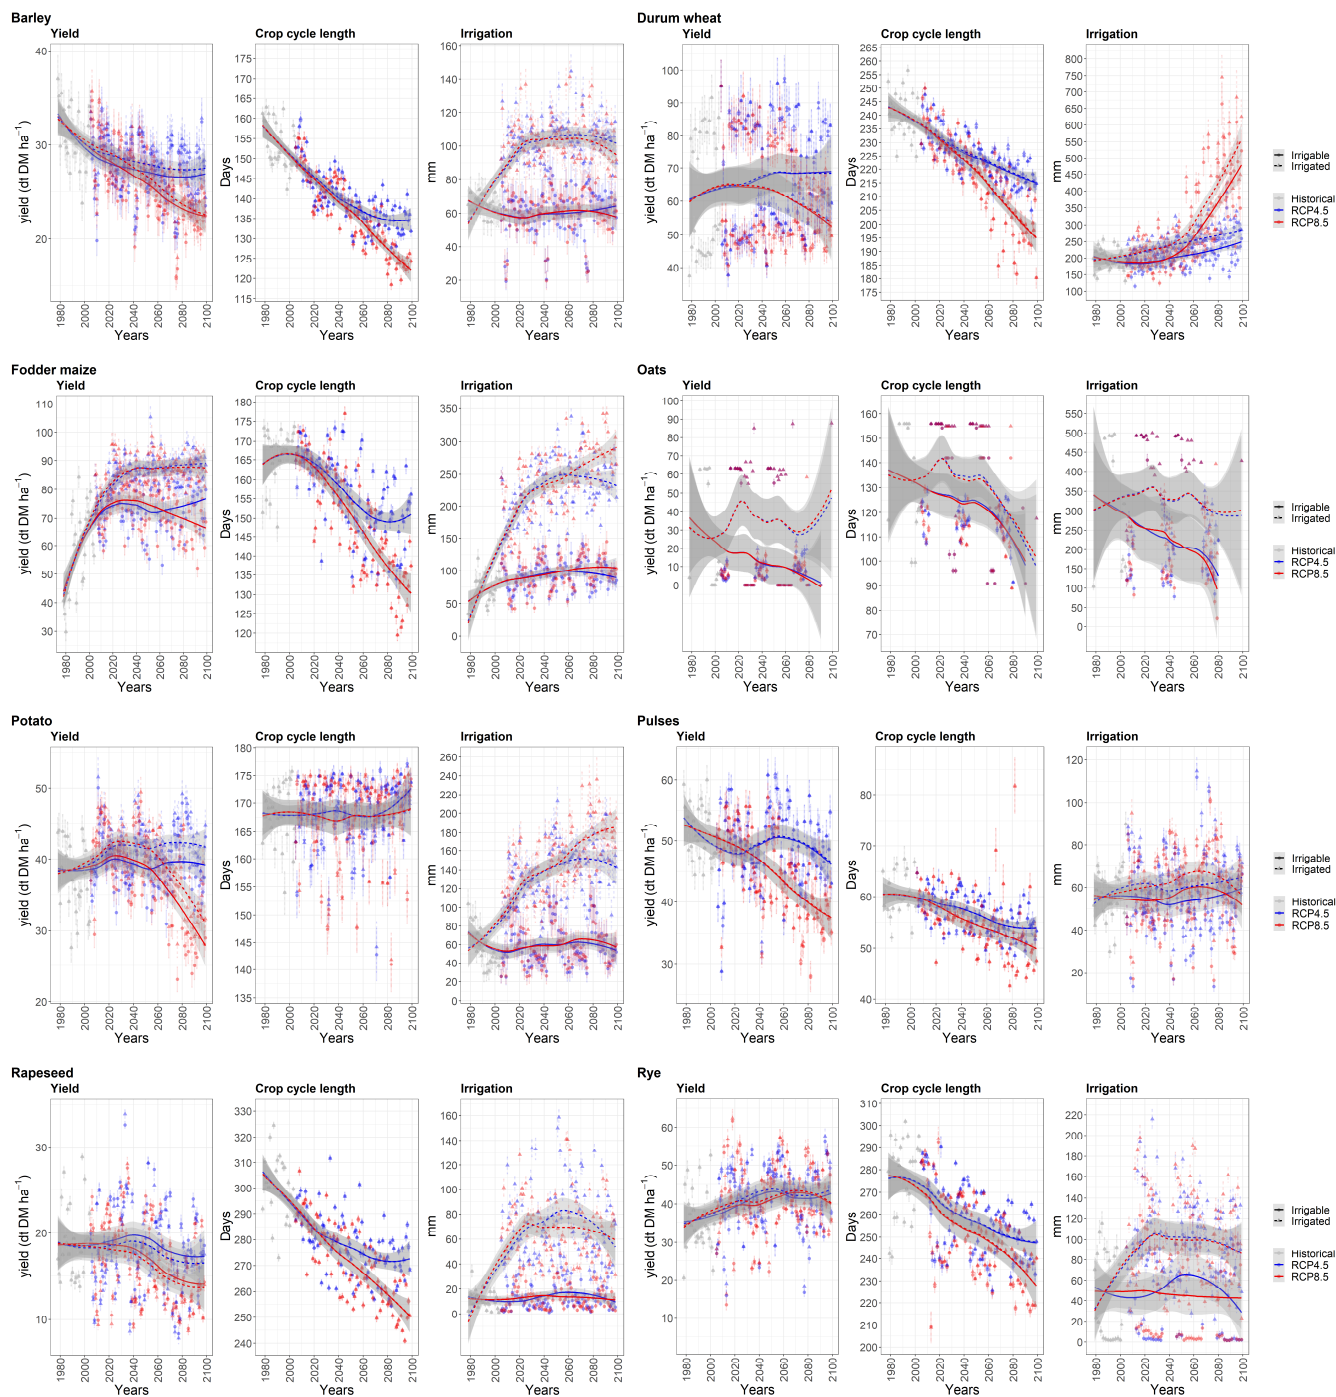

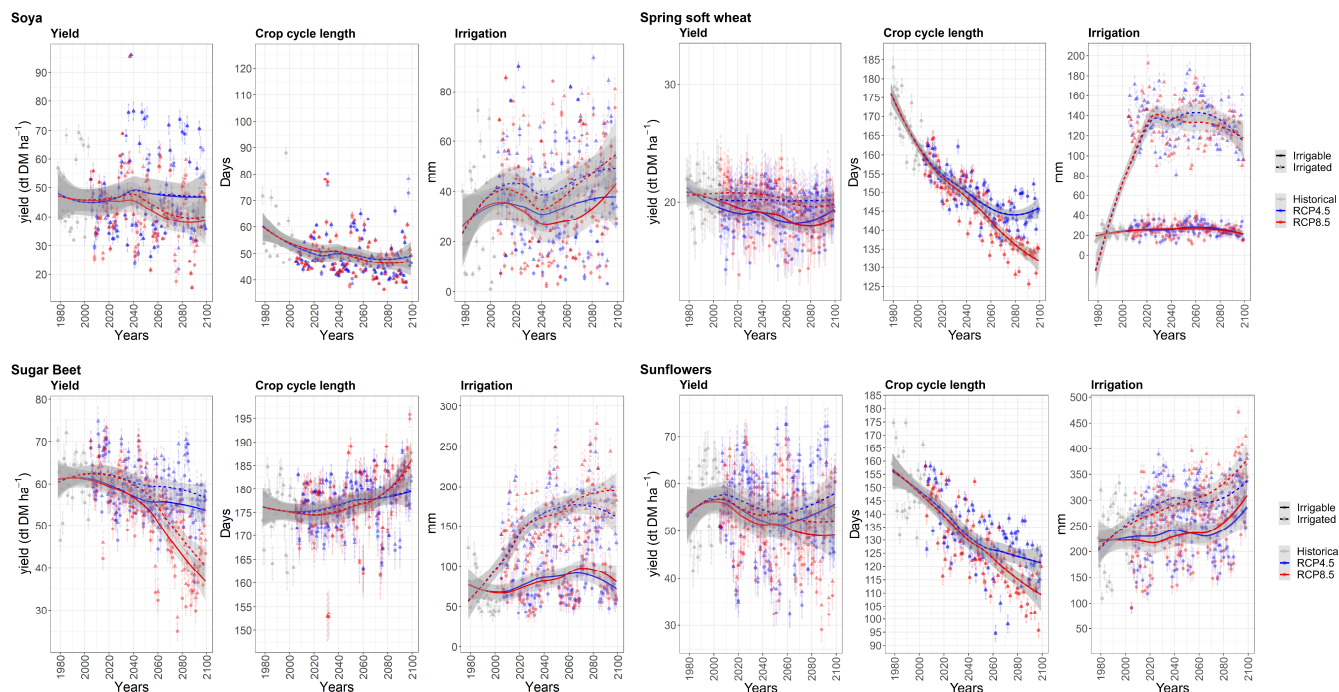

Fig. S4. Productions, length of the cropping season and irrigation needed for crops in the period 1978-2099 for the RCP4.5 and RCP8.5 climatic scenarios (blue and red colours, respectively) and with irrigable and automatic irrigation (solid and dashed lines, respectively); winter wheat and grain maize are reported in the Fig. 4.

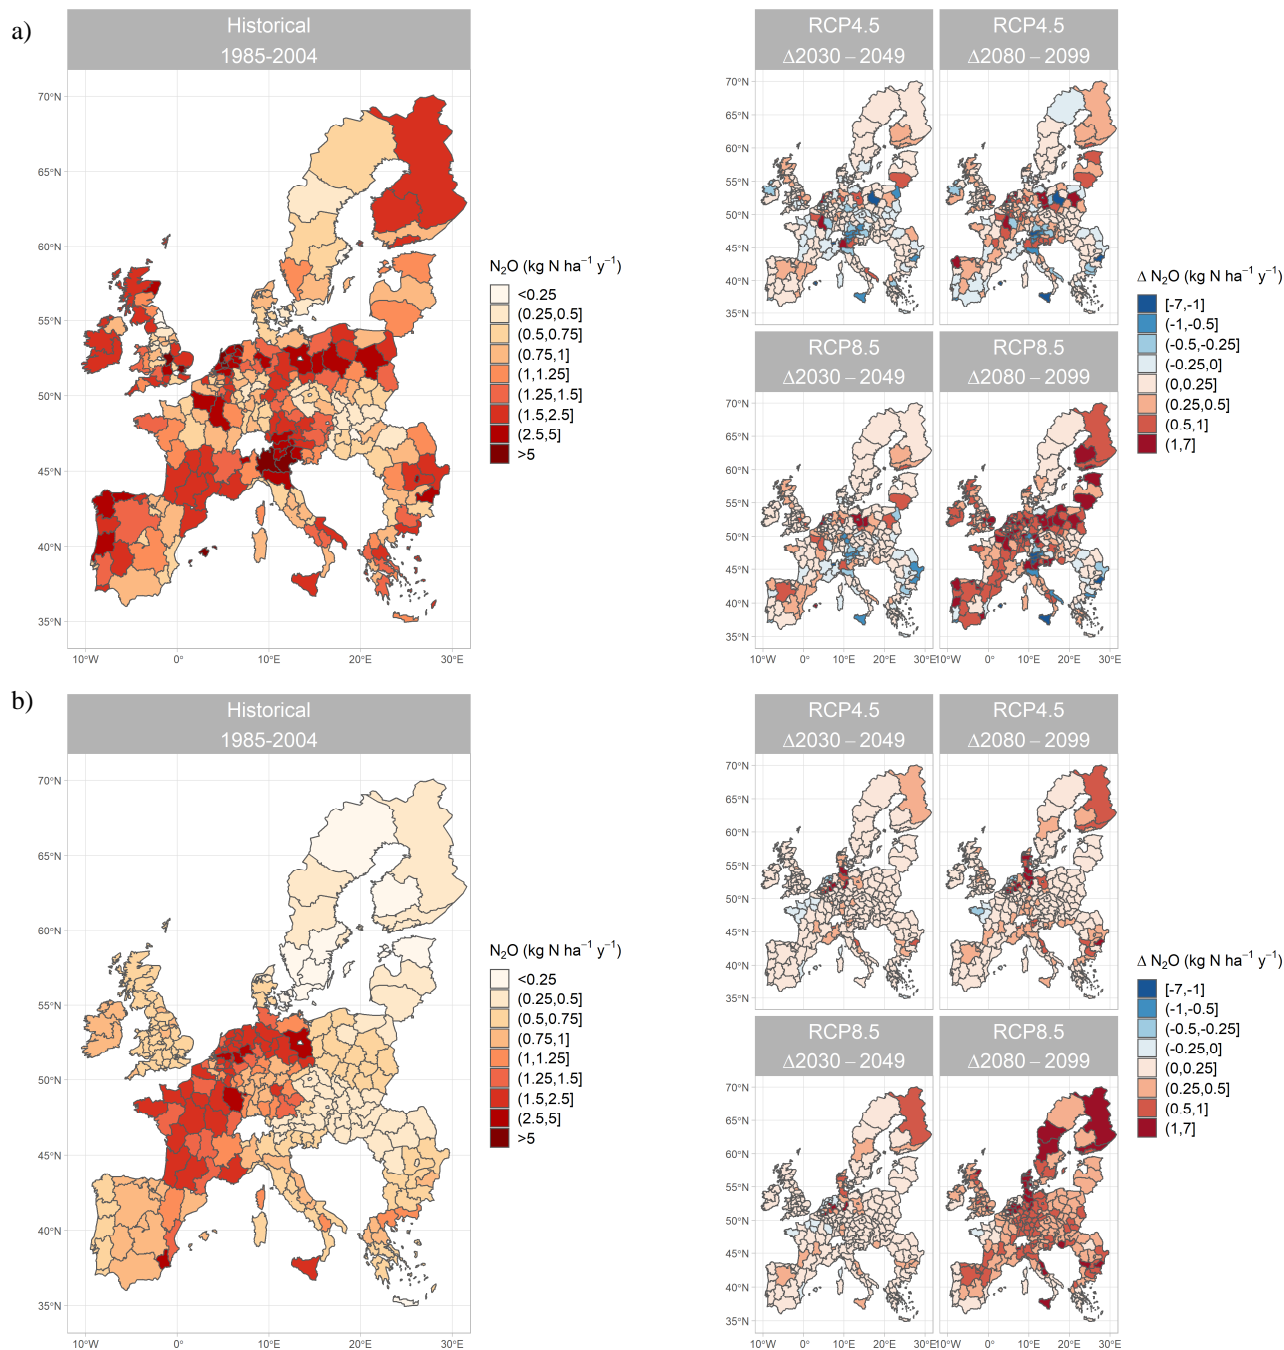

Fig S5.  $N_2O$  emissions (kg N ha<sup>-1</sup> y<sup>-1</sup>) for croplands (a) and grasslands (b) in the European administrative regions (NUTS2). Emissions are reported for the historical period (1985-2004), and the difference “Δ” from the middle (2030-2049) and the end (2075-2094) of the century for the two climatic scenarios RCP4.5 and RCP8.5.  $N_2O$  emissions are reported for cropland with the irrigable scenario.

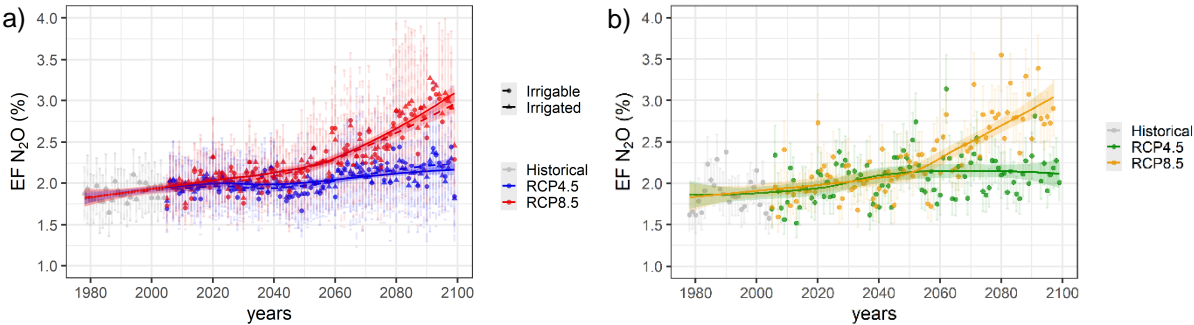

Fig S6. Emission factor, or the ratio between the N emitted as N<sub>2</sub>O and the N introduced into the system as fertiliser (not counting for the indirect emissions and nitrogen fixation) for croplands (a) and grasslands (b) in the historical period (1978-2004) and for the RCP4.5 and RCP8.5 scenarios. Croplands consider two irrigation conditions, following the irrigable agricultural area in Europe or extending the irrigation to all the arable lands (i\_RCP4.5 and i\_RCP8.5).

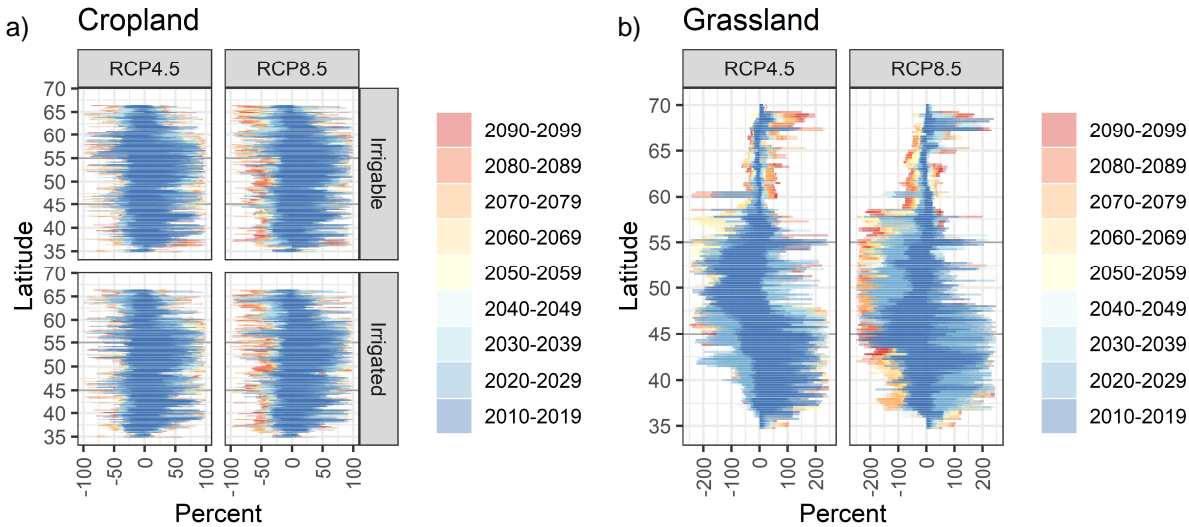

Fig S7. Relative Net ecosystem production (NEP) compared to the historical period (1978-2004). a) Croplands; b) Grasslands. X-axis reports the percentage of difference.

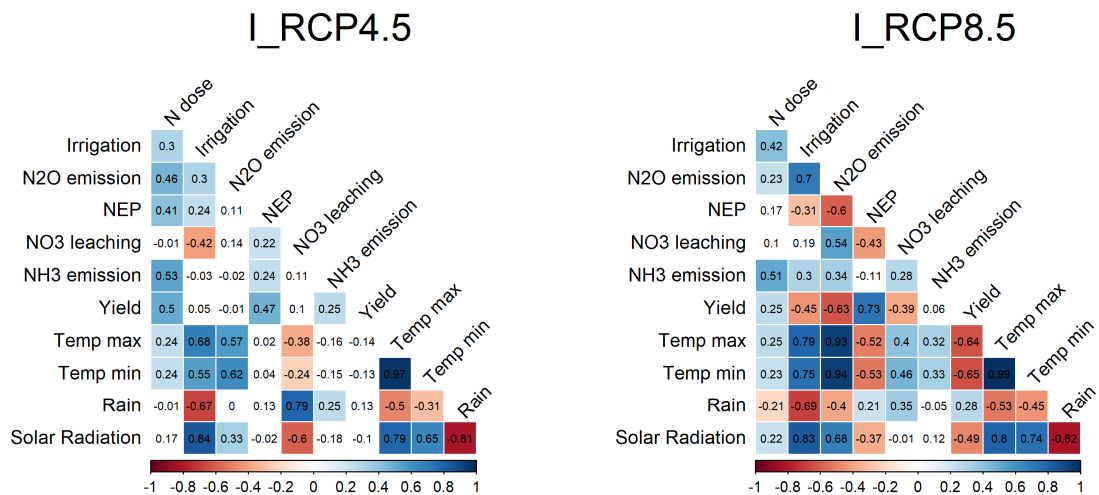

Fig S8. Correlation matrixes for croplands considering the most interesting indicators for the objective of this study. Correlation is presented for croplands for the irrigated scenarios i\_RCP4.5 and i\_RCP8.5 scenarios. Coloured squares means significant results (p-value < 0.05).



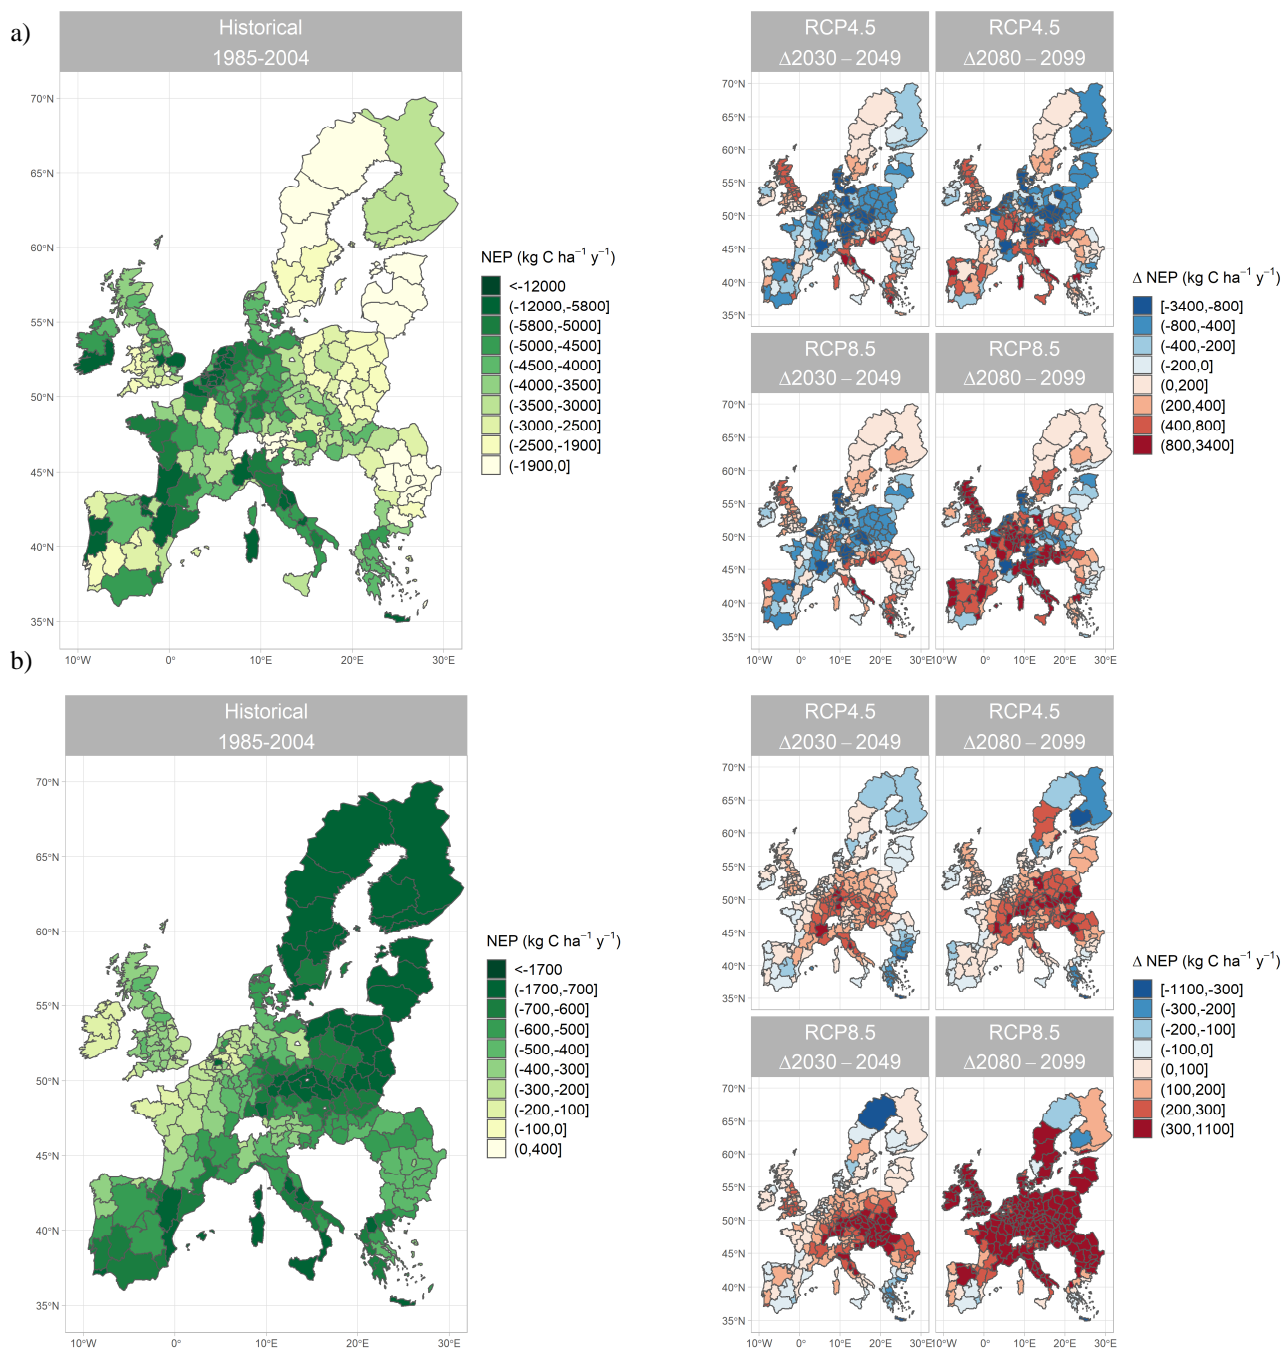

Fig S9. NEP ( $\text{kg C ha}^{-1} \text{ y}^{-1}$ ) for croplands (a) and grasslands (b) in the European administrative borders (NUTS2). Emissions are reported for the historical period (1985-2004), and the difference “ $\Delta$ ” from the middle (2030-2049) and the end (2075-2094) of the century for the two climatic scenarios RCP4.5 and RCP8.5. NEP is reported in cropland with the irrigable scenario.

**Table S1:** Crop and grassland productivity (t DM ha<sup>-1</sup> y<sup>-1</sup>) and NEP (Net Ecosystem Productivity; kg C-CO<sub>2</sub> ha<sup>-1</sup> y<sup>-1</sup>) in Europe reported by latitude gradients (low, mid, high) during the historical and the two climate change scenarios (RCP4.5 and RCP8.5), and with irrigation scenarios (*i\_RCP4.5* and *i\_RCP8.5*).

| Scenario         | Land use  | Productivity (t DM ha <sup>-1</sup> y <sup>-1</sup> ) |                                |                          | NEP (kg C-CO <sub>2</sub> ha <sup>-1</sup> y <sup>-1</sup> ) |                                |                          |
|------------------|-----------|-------------------------------------------------------|--------------------------------|--------------------------|--------------------------------------------------------------|--------------------------------|--------------------------|
|                  |           | low latitude<br>(<= 45°)                              | mid latitude<br>(>45° - <=55°) | high latitude<br>(> 55°) | low latitude<br>(<= 45°)                                     | mid latitude<br>(>45° - <=55°) | high latitude<br>(> 55°) |
| Period 1978-2004 |           |                                                       |                                |                          |                                                              |                                |                          |
| Historic         | Grassland | 4.58                                                  | 6.00                           | 5.80                     | -631                                                         | -450                           | -960                     |
|                  | Cropland  | 6.87                                                  | 5.15                           | 3.69                     | -4359                                                        | -3867                          | -2180                    |
| Period 2030-2049 |           |                                                       |                                |                          |                                                              |                                |                          |
| RCP4.5           | Grassland | 4.87                                                  | 5.67                           | 6.51                     | -587                                                         | -366                           | -976                     |
|                  | Cropland  | 6.69                                                  | 5.43                           | 4.14                     | -4508                                                        | -4239                          | -2259                    |
| <i>i_RCP4.5</i>  | Cropland  | 6.88                                                  | 5.76                           | 4.26                     | -4125                                                        | -4076                          | -2145                    |
| RCP 8.5          | Grassland | 4.91                                                  | 5.70                           | 6.67                     | -549                                                         | -226                           | -975                     |
|                  | Cropland  | 6.74                                                  | 5.38                           | 3.97                     | -4471                                                        | -4215                          | -2177                    |
| <i>i_RCP8.5</i>  | Cropland  | 6.89                                                  | 5.68                           | 4.15                     | -4093                                                        | -4028                          | -2051                    |
| Period 2080-2099 |           |                                                       |                                |                          |                                                              |                                |                          |
| RCP4.5           | Grassland | 5.06                                                  | 5.67                           | 7.08                     | -532                                                         | -310                           | -987                     |
|                  | Cropland  | 6.63                                                  | 5.29                           | 4.22                     | -4332                                                        | -4175                          | -2321                    |
| <i>i_RCP4.5</i>  | Cropland  | 6.83                                                  | 5.71                           | 4.34                     | -3896                                                        | -3980                          | -2235                    |
| RCP8.5           | Grassland | 4.62                                                  | 4.56                           | 6.56                     | -398                                                         | 36                             | -658                     |
|                  | Cropland  | 6.10                                                  | 4.74                           | 4.12                     | -4006                                                        | -3738                          | -2069                    |
| <i>i_RCP8.5</i>  | Cropland  | 6.19                                                  | 5.38                           | 4.30                     | -3632                                                        | -3469                          | -1990                    |



**Table S2:** Grain maize and winter soft wheat yields (t DM ha<sup>-1</sup> y<sup>-1</sup>) in EU reported by latitude gradients (low, mid, high) during the historical and two climate change scenarios.

|                  |                   | Productivity (t DM ha <sup>-1</sup> y <sup>-1</sup> ) |                                 |                          |
|------------------|-------------------|-------------------------------------------------------|---------------------------------|--------------------------|
| Scenario         | Land use          | low latitude<br>(<= 45°)                              | mid latitude<br>(>45° to <=55°) | high latitude<br>(> 55°) |
| Period 1978-2004 |                   |                                                       |                                 |                          |
| Historic         | Grain Maize       | 8.91                                                  | 6.14                            | -                        |
|                  | Winter Soft Wheat | 6.22                                                  | 4.80                            | 3.86                     |
| Period 2030-2049 |                   |                                                       |                                 |                          |
| RCP4.5           | Grain Maize       | 8.41                                                  | 6.73                            | -                        |
|                  | Winter Soft Wheat | 5.98                                                  | 5.16                            | 3.39                     |
| <i>i_RCP4.5</i>  | Grain Maize       | 9.04                                                  | 7.30                            | -                        |
|                  | Winter Soft Wheat | 6.06                                                  | 5.10                            | 3.37                     |
| RCP 8.5          | Grain Maize       | 8.83                                                  | 6.72                            | -                        |
|                  | Winter Soft Wheat | 5.95                                                  | 4.93                            | 3.13                     |
| <i>i_RCP8.5</i>  | Grain Maize       | 9.61                                                  | 7.20                            | -                        |
|                  | Winter Soft Wheat | 6.06                                                  | 4.86                            | 3.12                     |
| Period 2080-2099 |                   |                                                       |                                 |                          |
| RCP4.5           | Grain Maize       | 7.90                                                  | 6.49                            | -                        |
|                  | Winter Soft Wheat | 6.47                                                  | 4.63                            | 6.33                     |
| <i>i_RCP4.5</i>  | Grain Maize       | 8.87                                                  | 7.38                            | -                        |
|                  | Winter Soft Wheat | 6.59                                                  | 4.58                            | 6.16                     |
| RCP8.5           | Grain Maize       | 7.46                                                  | 4.97                            | -                        |
|                  | Winter Soft Wheat | 6.33                                                  | 4.20                            | 5.38                     |
| <i>i_RCP8.5</i>  | Grain Maize       | 8.29                                                  | 6.41                            | -                        |
|                  | Winter Soft Wheat | 6.48                                                  | 4.10                            | 5.40                     |

125 **Table S3.** Statistics of the simulated crop yields compared with Eurostat for the period 1978-2004. Yields are reported as standard humidity.

| <i>Crop</i>  | <b>MAE</b>            | <b>RMSE</b>           | <b>RRMSE</b> | <b>Minimum</b><br>t DM ha <sup>-1</sup> |                   | <b>Maximum</b><br>t DM ha <sup>-1</sup> |                   | <b>Mean</b><br>t DM ha <sup>-1</sup> |                   |
|--------------|-----------------------|-----------------------|--------------|-----------------------------------------|-------------------|-----------------------------------------|-------------------|--------------------------------------|-------------------|
|              | t DM ha <sup>-1</sup> | t DM ha <sup>-1</sup> | %            | <b>Simulated</b>                        | <b>Statistics</b> | <b>Simulated</b>                        | <b>Statistics</b> | <b>Simulated</b>                     | <b>Statistics</b> |
| Fodder Maize | 2.21                  | 2.97                  | 27.1         | 5.41                                    | 5.54              | 15.37                                   | 15.09             | 10.66                                | 10.95             |
| Grain Maize  | 1.58                  | 1.77                  | 31.8         | 5.44                                    | 4.61              | 8.76                                    | 6.66              | 7.15                                 | 5.56              |
| Oats         | 0.496                 | 0.648                 | 22.1         | 1.94                                    | 2.57              | 4.35                                    | 3.30              | 3.24                                 | 2.93              |
| Potato       | 3.3                   | 4.04                  | 19.2         | 13.14                                   | 18.59             | 21.10                                   | 24.00             | 17.93                                | 21.06             |
| Pulses       | 0.387                 | 0.462                 | 18.2         | 1.90                                    | 2.18              | 2.58                                    | 3.01              | 2.21                                 | 2.54              |
| Rapeseed     | 0.423                 | 0.495                 | 23.4         | 1.38                                    | 1.85              | 2.89                                    | 2.56              | 1.89                                 | 2.12              |
| Barley       | 0.543                 | 0.625                 | 17.6         | 2.38                                    | 3.09              | 3.71                                    | 4.09              | 3.10                                 | 3.55              |
| Soya         | 0.467                 | 0.621                 | 35           | 1.37                                    | 1.52              | 2.97                                    | 2.16              | 2.05                                 | 1.79              |
| Sugar Beet   | 4.35                  | 5.29                  | 12.8         | 30.94                                   | 36.99             | 48.03                                   | 48.93             | 40.74                                | 41.39             |
| Sunflowers   | 0.348                 | 0.405                 | 24.9         | 1.38                                    | 1.42              | 2.24                                    | 1.96              | 1.89                                 | 1.63              |
| Rye          | 0.852                 | 1.09                  | 38.6         | 2.06                                    | 2.46              | 5.27                                    | 3.41              | 3.57                                 | 2.83              |
| Wheat        | 0.894                 | 1.05                  | 25           | 3.59                                    | 3.47              | 6.16                                    | 4.83              | 5.02                                 | 4.21              |

## Cited Literature

- 130 Ainsworth, E.A., Leakey, A.D.B., Ort, D.R., and Long, S.P.: FACE-ing the facts: inconsistencies and interdependence among field, chamber, and modeling studies of elevated CO<sub>2</sub> impacts on crop yield and food supply. *New Phytol*, 179:5-9. <https://doi.org/10.1111/j.1469-8137.2008.02500.x>, 2008
- Allen, L.H. Jr.: Plant responses to rising carbon dioxide and potential interactions with air pollutants. *J. Environ. Qual.* 19, 15–34. <https://doi.org/10.2134/jeq1990.00472425001900010002x>, 1990.
- 135 Blanke, J., Boke-Olén, N., Olin, S., Chang, J., Sahlin, U., Lindeskog, M., and Lehsten, V.: Implications of accounting for management intensity on carbon and nitrogen balances of European grasslands. *PLoS One*, 13(8), p.e0201058. <https://doi.org/10.1371/journal.pone.0201058>, 2018.
- Campbell, G. S.: A simple method for determining unsaturated hydraulic conductivity from moisture retention data. *Soil Science*. 117 (6): 311-314. <https://doi.org/10.1097/00010694-197406000-00001>, 1974.
- 140 Chang, J., Viovy, N., Vuichard, N., Ciais, P., Campioli, M., Klumpp, K., Martin, R., Leip, A., and Soussana, J.-F.: Modeled changes in potential grassland productivity and in grass-fed ruminant livestock density in Europe over 1961-2010. *PLoS ONE*, 10 (5), art. no. e0127554, <https://doi.org/10.1371/journal.pone.0127554>, 2015a.
- Chang, J., Ciais, P., Viovy, N., Vuichard, N., Sultan, B., and Soussana, J. F.: The greenhouse gas balance of European grasslands. *Global Change Biol*, 21(10), 3748–3761. <https://doi.org/10.1111/gcb.12998>, 2015b.
- 145 Driessen, P.M.: The water balance of the soil. In: H. van Keulen, J. Wolf (Eds.), *Modelling of Agricultural Production: Weather, Soils and Crops*. Pudoc, Wageningen (1986), pp. 76-116, 1986.
- Hiederer, R.: Mapping Soil Properties for Europe - Spatial Representation of Soil Database Attributes. Luxembourg: Publications Office of the European Union - 2013 - 47pp. EUR26082EN Scientific and Technical Research series, ISSN 1831-9424, <https://doi.org/10.2788/94128>; Database: <https://esdac.jrc.ec.europa.eu/content/european-soil-database-derived-data> (Accessed 21/02/2021), 2013.
- 150 Hoffmann, F., Beinhauer, R., and Dadoun, F.: Soil temperature model for CERES and similar crop models. *J. Agron. and Crop Sci.* 170:56-65. <https://doi.org/10.1111/j.1439-037X.1993.tb01056.x>, 1993.
- Jones, C.A. and Kiniry, J.R.: CERES-Maize: A simulation model of maize growth and development. Texas A&M University Press, Temple, TX, USA., 1986
- 155 Kimball, B.A.: Crop responses to elevated CO<sub>2</sub> and interactions with H<sub>2</sub>O, N, and temperature. *Curr Opin Plant Biol*, 31, 36–43. <https://doi.org/10.1016/j.pbi.2016.03.006>, 2016.
- Long, S.P., Ainsworth, E.A., Rogers, A., and Ort, D.R.: Rising atmospheric carbon dioxide: plants FACE the future. *Ann Rev Plant Biol* 55:591-628. <https://doi.org/10.1146/annurev.arplant.55.031903.141610>, 2004.
- Morgan, J.A., LeCain, D.R., Pendall, E., Blumenthal, D.M., Kimball, B.A., Carrillo, Y., Williams, D.G., Heisler-White, J., Dijkstra, F.A., and West, M.: C<sub>4</sub> grasses prosper as carbon dioxide eliminates desiccation in warmed semi-arid grassland. *Nature*, 476: 202-206. <https://doi.org/10.1038/nature10274>, 2011.
- 160 Ritchie, J.T.: Model for predicting evaporation from a row crop with incomplete cover. *Water Resour. Res.* 8, 1204-1213. <https://doi.org/10.1029/WR008i005p01204>, 1972.
- Tubiello, F.N., and Ewert F.: Simulating the effects of elevated CO<sub>2</sub> on crops: Approaches and applications for climate change. *Eur. J. Agron.*, 18, 57-74, [https://doi.org/10.1016/S1161-0301\(02\)00097-7](https://doi.org/10.1016/S1161-0301(02)00097-7), 2002.
- 165 Wösten, J.H.M., Lilly, A., Nemes, A. and Le Bas, C.: Development and use of a database of hydraulic properties of European soils. *Geoderma*. [https://doi.org/10.1016/S0016-7061\(98\)00132-3](https://doi.org/10.1016/S0016-7061(98)00132-3), 1999.
- Wriedt, G., van der Velde, M., Aloe, A., and Bouraoui, F.: A European irrigation map for spatially distributed agricultural modelling. *Agricultural Water Management*, 96 (5), pp. 771-789. <http://doi.org/10.1016/j.agwat.2008.10.012>, 2009.
